# Supplementary material for: Evaluating model parameterizations of submicron aerosol scattering and absorption with in situ data from ARCTAS 2008
Source: Copernicus journal article supplement (doi:10.5194/acp-16-9435-2016), 2016-07-29
Supplement: Supplementary file [file acp-16-9435-2016-supplement-title-page.pdf › acp-16-9435-2016-supplement-title-page.pdf]

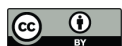

## *Supplement of*

# **Evaluating model parameterizations of submicron aerosol scattering and absorption with in situ data from ARCTAS 2008**

**Matthew J. Alvarado et al.**

*Correspondence to:* Matthew J. Alvarado (malvarad@aer.com)

- [acp-16-9435-2016-supplement-title-page.pdf](#)
- Paper\_Supplement
  - README
  - gcrt-fastjx-tables.dat
  - gcv902-fastjx-tables.dat
  - gmi-fastjx-tables.dat

The copyright of individual parts of the supplement might differ from the CC-BY 3.0 licence.
